# Supplementary material for: Non-Targeted Metabolomics Reveals the Effects of Different Rolling Methods on Black Tea Quality
Source: MDPI journal article supplement (doi:10.3390/foods13020325), 2024-01-19
Supplement: s1 [file s1]

## **Supplementary Materials**

**Table S1.** List of abbreviations.

| Abbreviation | Full name                                             | Abbreviation   | Full name                                                                                |
|--------------|-------------------------------------------------------|----------------|------------------------------------------------------------------------------------------|
| GC-MS        | Gas chromatography-Mass spectrometry                  | UHPLC-Q-TOF/MS | Ultra-High Performance Liquid Chromatography-Quadrupole Time-of-flight Mass Spectrometry |
| GBVs         | green bitterness volatiles                            | PPO            | polyphenol oxidase                                                                       |
| POD          | peroxidase                                            | HS-SPME        | Head space-Solid phase micro-extraction                                                  |
| RI           | Retention Index                                       | PCA            | Principal component analysis                                                             |
| OPLS-DA      | Orthogonal partial least square discriminate analysis | ANOVA          | Analysis of Variance                                                                     |
| C            | Catechin                                              | CG             | Catechin gallate                                                                         |
| EC           | Epicatechin catechin                                  | ECG            | Epicatechin gallate                                                                      |
| EGCG         | Epigallocatechin gallate                              | GC             | Gallo-catechin                                                                           |
| GCG          | Gallo-catechin gallate                                | TF             | Theaflavin                                                                               |

**Table S2.** Detail information of Tea Samples.

|                                                          |                           |
|----------------------------------------------------------|---------------------------|
| Different rolling<br>time processing<br>(Process Sample) | Fresh leaves (FL)         |
|                                                          | Rolled for 0min (RT0)     |
|                                                          | Rolled for 20min (RT20)   |
|                                                          | Rolled for 40min (RT40)   |
|                                                          | Rolled for 60min (RT60)   |
|                                                          | Rolled for 80min (RT80)   |
|                                                          | Rolled for 100min (RT100) |
|                                                          | Rolled for 120min (RT120) |

**Table S3. Information of chemicals and reagents.**

| Chemicals and reagents                                                                                                                                                                                                                                                                                                                                                                                                                                                                                                                                                                                                                                                                                                                                                                                                                                                                                                                                                                                                                                                                                                                                                                                                                                                                                      | Manufacturer                                                                 |
|-------------------------------------------------------------------------------------------------------------------------------------------------------------------------------------------------------------------------------------------------------------------------------------------------------------------------------------------------------------------------------------------------------------------------------------------------------------------------------------------------------------------------------------------------------------------------------------------------------------------------------------------------------------------------------------------------------------------------------------------------------------------------------------------------------------------------------------------------------------------------------------------------------------------------------------------------------------------------------------------------------------------------------------------------------------------------------------------------------------------------------------------------------------------------------------------------------------------------------------------------------------------------------------------------------------|------------------------------------------------------------------------------|
| Methanol of LC–MS grade                                                                                                                                                                                                                                                                                                                                                                                                                                                                                                                                                                                                                                                                                                                                                                                                                                                                                                                                                                                                                                                                                                                                                                                                                                                                                     | Thermo Fisher                                                                |
| LC-MS-grade formic acid, dichloromethane, n-alkanes C <sub>3</sub> –C <sub>25</sub> , etofylline, ethyl caprate                                                                                                                                                                                                                                                                                                                                                                                                                                                                                                                                                                                                                                                                                                                                                                                                                                                                                                                                                                                                                                                                                                                                                                                             | Sigma (St Louis, MO, USA)                                                    |
| Anhydrous sodium sulfate (Na <sub>2</sub> SO <sub>4</sub> ) and sodium chloride (NaCl)                                                                                                                                                                                                                                                                                                                                                                                                                                                                                                                                                                                                                                                                                                                                                                                                                                                                                                                                                                                                                                                                                                                                                                                                                      | Shanghai Hushi Co., Ltd. (Shanghai, China)                                   |
| Taste standards: amino acid standards (histidine, tryptophan, lysine, serine, glutamate, glutamine, aspartic acid, asparagine, arginine, tyrosine, proline, valine, isoleucine, leucine, threonine, phenylalanine, glycine, alanine, methionine, theanine, $\gamma$ -aminobutyric acid), catechin standards (gallocatechin, epigallocatechin, catechin, epicatechin, epigallocatechin gallate, gallocatechin gallate, epicatechin gallate, epiafzelechin, procyanidin B1/B2), theaflavin standards (theaflavin, theaflavin-3-gallate, theaflavin-3'-gallate, theaflavine-3,3'-digallate), phenolic acid standards (quinic acid, p-coumaric acid, chlorogenic acid, gallic acid, caffeic acid), alkaloid standards (theobromine, theophylline, caffeine), and flavonoid standards (vitexin glucoside, vitexin, vitexin rhamnoside, quercetin, quercetin-7- <i>O</i> -glucoside, quercetin 3- <i>O</i> -rutinoside, quercetin, quercetin-3- <i>O</i> -glucosylrhamnoside, quercetin-7- <i>O</i> - $\alpha$ -l-rhamnoside, quercetin-3-galactoside, quercetin-3- <i>O</i> - $\beta$ - <i>d</i> -glucopyranoside, myricetin, myricetin-3- <i>O</i> -galactoside, kaempferol, dihydro kaempferol-7- <i>O</i> -rhamnoside, kaempferol-3- <i>O</i> -glucoside, isovitexin, isovitexin-2''- <i>O</i> -arabinoside). | Chemfaces (Wuhan, China)<br>Yuanye Bio-Technology Co., Ltd (Shanghai, China) |
| GBVs: benzyl $\beta$ -glucoside, 2-phenylethyl glucoside, ( <i>Z</i> )-3-hexenyl glucoside, geranyl glucoside, benzyl $\beta$ -primeveroside, nerol glucoside, 2-phenylethyl primeveroside, ( <i>Z</i> )-3-hexenyl primeveroside, geranyl primeveroside, nerol primeveroside                                                                                                                                                                                                                                                                                                                                                                                                                                                                                                                                                                                                                                                                                                                                                                                                                                                                                                                                                                                                                                | National Glycoengineering Research Center, NGRC (Jinan, China)               |
| Aroma standards: 1-octen-3-ol, <i>p</i> -Cymene, cycloheptanol, 1-undecyne, n-decanoic acid, dimethyl phthalate, ethyl vanillin, $\beta$ -ocimene, nonanal, benzyl acetate, ( <i>Z</i> )-2-hexenyl hexanoate, myrtenol, dodecane, decanal, ( <i>E,E</i> )-2,4-nonadienal, citronellol, ( <i>Z</i> )-3-hexenyl- $\alpha$ -methylbutyrate, ( <i>E</i> )-2-decenal, 2,6,11-trimethyl-dodecane, geranyl formate, benzyl butyrate, geranyl acetate, tetradecane, $\alpha$ -farnesene, hexanoic acid phenylmethyl ester, methyl jasmonate, neophytadiene, 2-methyl-butanal, 3-methyl-3-buten-2-one, 1-penten-3-one, 2-methyl-3-buten-2-ol, undecane, 3-pentanol, ( <i>E</i> )-2-pentenal, 1-penten-3-ol, $\beta$ -myrcene, 3-methyl-1-                                                                                                                                                                                                                                                                                                                                                                                                                                                                                                                                                                            |                                                                              |

|                                                                                                                                                                                                                                                                                                                                                                                                                                                                                                                                                                                                                                                                                                                                                                                                                                                                                                                                                                                                     |                                                                                                                                                                                                                             |
|-----------------------------------------------------------------------------------------------------------------------------------------------------------------------------------------------------------------------------------------------------------------------------------------------------------------------------------------------------------------------------------------------------------------------------------------------------------------------------------------------------------------------------------------------------------------------------------------------------------------------------------------------------------------------------------------------------------------------------------------------------------------------------------------------------------------------------------------------------------------------------------------------------------------------------------------------------------------------------------------------------|-----------------------------------------------------------------------------------------------------------------------------------------------------------------------------------------------------------------------------|
| butanol, ( <i>E</i> )-2-hexenal, 1-pentanol, 1-hexanol, 2-cyclopenten-1-one, ( <i>Z</i> )-3-hexen-1-ol, ( <i>E</i> )-2-hexen-1-ol, tridecane, ( <i>Z</i> )-2-hexen-1-ol, 1-heptanol, furfural, ( <i>E</i> )-butanoic acid 3-hexenyl ester, linalool, ( <i>Z</i> )-linalool oxide (furanoid), 1-octanol, dimethyl sulfoxide, hexadecane, ( <i>E</i> )-2-octen-1-ol, 2,5-dimethylcyclohexanol, 1-ethyl-1H-pyrrole-2-carboxaldehyde, ethyl caprate, 1-nonanol, ( <i>Z</i> )-hexanoic acid 3-hexenyl ester, ( <i>Z</i> )-3-nonen-1-ol, $\alpha$ -terpineol, heptadecane, geranylacetone, maltol, 1-(1H-pyrrol-2-yl)-ethanone, 1-dodecanol, (3 <i>Z</i> )-3-hexen-1-yl benzoate, 2,4-di-tert-butylphenol, coumarin, benzeneacetaldehyde, linalool oxide (pyranoid), naphthalene, geraniol, indole, $\alpha$ -ionone, $\beta$ -phenylethyl butyrate, ( <i>E</i> )- $\beta$ -farnesene, ( <i>E</i> )- $\beta$ -Ionone, dihydroactinidiolide, ( <i>E,Z</i> )-2,6-nonadienal, ( <i>E,E</i> )-2,4-heptadienal | Yuanye Bio-Technology Co., Ltd<br>(Shanghai, China)<br><br>Aladdin Biochemical Technology Co., Ltd<br>(Shanghai, China)<br><br>Sigma (St Louis, MO, USA)<br><br>MackLin Biochemical Technology Co.,<br>Ltd(Shanghai, China) |
| Color standards: Chlorophyll a and b, lutein, and $\beta$ -carotene                                                                                                                                                                                                                                                                                                                                                                                                                                                                                                                                                                                                                                                                                                                                                                                                                                                                                                                                 | Sigma (St Louis, MO, USA)                                                                                                                                                                                                   |

**Table S4: Relative content of main volatile components during different rolling times of black tea (µg/g).**

| Compound | Compound name                                     | R.T.  | Actual | Reference | Relative content (µg/g) |              |              |              |              |              |              |
|----------|---------------------------------------------------|-------|--------|-----------|-------------------------|--------------|--------------|--------------|--------------|--------------|--------------|
|          |                                                   |       | RI     | RI        | RT0                     | RT20         | RT40         | RT60         | RT80         | RT100        | RT120        |
| Alcohols | 3-Hexen-1-ol                                      | 4.14  | 864    | 856       | 5.18±1.37b              | 10.06±1.02a  | 9.79±1.79a   | 10.48±0.84a  | 10.16±1.6a   | 10.21±1.49a  | 10.72±1.37a  |
|          | cis-2-Hexen-1-ol                                  | 4.33  | 872    | 868       | 10.03±0.47d             | 20.66±1.27a  | 17.71±1.14b  | 17.07±0.76b  | 14.24±1.46c  | 13.02±0.51c  | 11.25±0.78d  |
|          | benzyl alcohol                                    | 6.19  | 959    | 962       | 24.44±1.14c             | 32.26±0.82b  | 29.85±1.68b  | 30.46±0.45b  | 31.2±2.09b   | 37.79±6.72a  | 32.91±1.65ab |
|          | (cis)-Linalool oxide (furans)                     | 9.32  | 1067   | 1074      | 25.98±2.35c             | 33.1±1.28a   | 30.81±1.55ab | 30.79±1.68ab | 29.24±1.45bc | 26.98±2.98c  | 28.69±1.17bc |
|          | (trans)-Linalool oxide (furans)                   | 9.90  | 1085   | 1086      | 32.85±0.48c             | 44.73±2.44a  | 42.65±4.05ab | 42.5±4.97ab  | 40.69±3.2ab  | 39.34±1.86b  | 39.17±0.91b  |
|          | linalool                                          | 10.39 | 1100   | 1099      | 35.45±2.64c             | 41.41±4.95ab | 46.06±1.18a  | 41.57±1.06ab | 44.09±1.58a  | 37.41±4.53bc | 35.77±2.67c  |
|          | phenethyl alcohol                                 | 10.95 | 1113   | 1116      | 44.92±0.69b             | 48.58±1.9ab  | 47.02±4.14ab | 48.66±4.69ab | 46.06±4.31b  | 49.55±3.46ab | 52.67±0.62a  |
|          | cis-3-Nonen-1-ol                                  | 12.78 | 1150   | 1156      | 1.92±0.18c              | 2.33±0.3bc   | 2.59±0.23ab  | 2.6±0.23ab   | 2.83±0.41ab  | 2.65±0.22ab  | 3.1±0.45a    |
|          | 3,6-Nonenylidene-1-ol                             | 12.89 | 1152   | 1156      | 2.33±0.37               | 2.09±0.18    | 2.4±0.24     | 2.33±0.07    | 2.26±0.3     | 2.03±0.27    | 2.46±0.16    |
|          | trans-Linalool Oxide (Pyran)                      | 13.87 | 1172   | 1173      | 22.81±0.16b             | 28.33±2.4a   | 28.62±3.09a  | 28.37±4.09a  | 28.12±2.56a  | 28.82±2.22a  | 29.04±1.62a  |
|          | L-Menthol                                         | 14.01 | 1175   | 1175      | 0.23±0.05a              | 0.13±0bc     | 0.16±0.01b   | 0.15±0.02b   | 0.11±0.03c   | 0.12±0c      | 0.15±0.02bc  |
|          | α-Terpineol                                       | 14.83 | 1193   | 1189      | 3.46±0.41ab             | 3.52±0.44ab  | 3.63±0.4a    | 3.19±0.28abc | 3.45±0.29ab  | 2.76±0.22c   | 2.87±0.51bc  |
|          | 6,6-Dimethyl-dicyclo [3.1.1] hept-2-ene-2-ethanol | 14.96 | 1195   | 1202      | 1.8±0.17b               | 1.96±0.24b   | 2.04±0.19ab  | 1.86±0.13b   | 2.16±0.3ab   | 1.98±0.06b   | 2.47±0.47a   |
|          | nerolidol                                         | 16.32 | 1220   | 1228      | 9.02±1.97b              | 11.08±0.33a  | 10.72±0.99ab | 10.63±0.81ab | 11.21±0.78a  | 10.73±0.5ab  | 12.42±1.65a  |
|          | Dihydrocarbinol                                   | 16.51 | 1223   | 1195      | 0.69±0.03c              | 1.87±0.55b   | 1.93±0.26ab  | 2.01±0.36ab  | 2.51±0.38a   | 1.76±0.13b   | 2.35±0.42ab  |
|          | (3Z)-3,7-Dimethyl-3,6-octadien-1-ol               | 16.60 | 1225   | 1240      | 1.45±0.09c              | 2±0.26a      | 2.03±0.28a   | 1.88±0.2ab   | 1.99±0.17a   | 1.52±0.23bc  | 1.91±0.33ab  |
|          | geraniol                                          | 18.06 | 1251   | 1255      | 53.92±6.97c             | 78.55±9.14ab | 77.55±1.47b  | 82.24±3.26ab | 83.54±9.64ab | 84.47±2.64ab | 88.92±2.33a  |

|        |                           |       |      |      |              |              |              |              |              |              |             |
|--------|---------------------------|-------|------|------|--------------|--------------|--------------|--------------|--------------|--------------|-------------|
|        | 8-hydroxylinalool         | 23.83 | 1357 | 1361 | 0.12±0.02b   | 0.37±0.09a   | 0.52±0.17a   | 0.48±0.07a   | 0.57±0.13a   | 0.49±0.06a   | 0.45±0.15a  |
|        | trans-Nerolidol           | 33.78 | 1552 | 1564 | 5.09±0.42b   | 6.06±1.26ab  | 6.29±0.34ab  | 6.89±0.72a   | 6.36±0.93ab  | 5.94±0.51ab  | 6.52±1.21ab |
|        | cedrenol                  | 35.57 | 1589 | 1610 | 1.43±0.07a   | 0.48±0.04ef  | 0.57±0.01de  | 0.71±0.03c   | 0.58±0.08d   | 0.46±0.04f   | 0.94±0.08b  |
|        | ethyl alcohol             | 36.46 | 1653 | 1668 | 1.31±0.02b   | 1.46±0.29ab  | 1.59±0.19a   | 1.67±0.13a   | 1.59±0.08a   | 1.51±0ab     | 1.71±0.07a  |
|        | α-Dehydrol                | 37.41 | 1784 | 1791 | 2.38±0.17a   | 1.67±0.05c   | 1.75±0.13bc  | 1.92±0.19bc  | 1.8±0.15bc   | 1.79±0.15bc  | 1.95±0.17b  |
|        | palm oleinol              | 41.83 | 1857 | 1863 | 0.31±0.07abc | 0.34±0.09ab  | 0.35±0.05a   | 0.31±0.01abc | 0.24±0.03cd  | 0.25±0.01bcd | 0.17±0.02d  |
|        | phytol                    | 44.57 | 2106 | 2114 | 1±0.22abc    | 1.13±0.2ab   | 1.18±0.21a   | 1±0.17abc    | 0.83±0.12bcd | 0.81±0.05cd  | 0.68±0.16d  |
| Esters | cis-3-Hexenylbutyl ester  | 14.39 | 1184 | 1187 | 5.2±0.54a    | 3.71±0.45bc  | 3.87±0.58b   | 2.98±0.62cde | 3.33±0.16bcd | 2.44±0.03e   | 2.48±0.61de |
|        | Methyl salicylate         | 14.62 | 1188 | 1192 | 14.05±0.95c  | 24.07±1.88ab | 24.49±1.66a  | 23.41±0.31ab | 23.55±1.74ab | 21.91±1.07b  | 22.32±1.8ab |
|        | Isovaleryl foliate        | 16.69 | 1227 | 1238 | 7.31±0.34a   | 5.73±0.85bc  | 6.17±1.04b   | 4.71±0.6cd   | 5.73±0.25bc  | 4.39±0.2d    | 4.25±0.58d  |
|        | Butyloctanolactone        | 19.35 | 1274 | 1288 | 0.38±0.05d   | 0.4±0.04cd   | 0.52±0.06bcd | 0.52±0.17bcd | 0.59±0.08abc | 0.64±0.12ab  | 0.78±0.25a  |
|        | Theaspirane               | 20.38 | 1292 | 1302 | 1.06±0.15b   | 1.27±0.21ab  | 1.66±0.5ab   | 1.68±0.4ab   | 1.79±0.52a   | 1.42±0.21ab  | 1.62±0.31ab |
|        | Geranyl formate           | 20.54 | 1295 | 1300 | 0.37±0.03b   | 0.58±0.15a   | 0.59±0.07a   | 0.64±0.07a   | 0.64±0.07a   | 0.6±0.04a    | 0.71±0.23a  |
|        | Methyl geranylate         | 21.82 | 1318 | 1324 | 5.6±0.3a     | 4.75±0.4b    | 4.78±0.16b   | 4.17±0.27cd  | 4.49±0.39bc  | 3.89±0.05d   | 4.15±0.48cd |
|        | Folyl caproate            | 24.86 | 1377 | 1380 | 15.7±0.63a   | 13.77±2.78ab | 12.87±1.04bc | 11.26±1.83bc | 12.91±0.41bc | 11.57±0.96bc | 11.07±1.37c |
|        | Hexyl caproate            | 25.17 | 1382 | 1384 | 11.07±0.72a  | 8.58±1.48b   | 8.58±0.61b   | 7.78±0.68bc  | 8.29±0.55b   | 8.25±1.42b   | 6.4±0.23c   |
|        | trans-2-Hexenyl hexanoate | 25.33 | 1385 | 1391 | 9.92±0.87bc  | 10.04±0.22bc | 11.62±1.34a  | 10.69±0.69ab | 11.48±0.65a  | 9.81±0.45bc  | 9.25±0.15c  |
|        | coumarin                  | 27.00 | 1418 | 1441 | 1.24±0.17a   | 1.13±0.19ab  | 1.21±0.12ab  | 1.18±0.14ab  | 1.19±0.19ab  | 1.14±0.2ab   | 0.91±0.21b  |
|        | Phenethyl butyrate        | 27.54 | 1428 | 1447 | 2.54±0.26a   | 1.64±0.18c   | 2±0.21b      | 1.69±0.26bc  | 1.9±0.06bc   | 1.72±0.04bc  | 1.75±0.17bc |
|        | Dimethyl phthalate        | 27.86 | 1433 | 1455 | 10.93±0.31a  | 9.39±1.4abc  | 10.14±0.72ab | 8.6±0.87bc   | 9.92±1.19abc | 8.91±0.4bc   | 8.55±0.88c  |
|        | Butyldecalactone          | 30.11 | 1477 | 1496 | 1.54±0.09    | 1.49±0.23    | 1.53±0.11    | 1.53±0.11    | 1.6±0.13     | 1.53±0.05    | 1.66±0.2    |
|        | Dihydroactinidiolide      | 31.67 | 1507 | 1532 | 1.93±0.12a   | 1.58±0.24b   | 1.65±0.1b    | 1.76±0.06ab  | 1.81±0.13ab  | 1.65±0.12b   | 1.92±0.02a  |

|           |                                                                   |       |      |      |               |                 |                |                |                |                |                |
|-----------|-------------------------------------------------------------------|-------|------|------|---------------|-----------------|----------------|----------------|----------------|----------------|----------------|
|           | Benzyl hexanoate                                                  | 32.94 | 1534 | 1547 | 0.59 ± 0.03c  | 0.68 ± 0.15bc   | 0.76 ± 0.1abc  | 0.81 ± 0.03ab  | 0.82 ± 0.09ab  | 0.8 ± 0.03ab   | 0.91 ± 0.23a   |
|           | Folium benzoate                                                   | 34.13 | 1559 | 1570 | 7.01 ± 0.46a  | 3.95 ± 0.67b    | 4.21 ± 0.34b   | 4.23 ± 0.14b   | 4.21 ± 0.38b   | 4.09 ± 0.16b   | 3.91 ± 0.05b   |
|           | Geranyl isovalerate                                               | 34.38 | 1565 | 1606 | 1.13 ± 0.07a  | 0.62 ± 0.03b    | 0.76 ± 0.03b   | 0.73 ± 0.08b   | 0.73 ± 0.13b   | 0.7 ± 0.08b    | 0.81 ± 0.21b   |
|           | Hexyl benzoate                                                    | 34.53 | 1568 | 1580 | 5.25 ± 0.46a  | 1.99 ± 0.09b    | 2 ± 0.21b      | 2.06 ± 0.49b   | 2.1 ± 0.25b    | 2.05 ± 0.27b   | 1.94 ± 0.31b   |
|           | Caryophyllin                                                      | 35.47 | 1587 | 1581 | 0.39 ± 0.05b  | 0.39 ± 0.07b    | 0.47 ± 0.06ab  | 0.51 ± 0.05a   | 0.48 ± 0.05ab  | 0.46 ± 0.01ab  | 0.56 ± 0.07a   |
|           | Isooctyl salicylate                                               | 40.64 | 1795 | 1811 | 1.27 ± 0.33b  | 1.14 ± 0.3b     | 1.11 ± 0.09b   | 2.52 ± 0.09a   | 1.26 ± 0.23b   | 1.15 ± 0.23b   | 1.49 ± 0.04b   |
|           | Isopropyl myristate                                               | 41.05 | 1820 | 1827 | 1.16 ± 0.35a  | 0.56 ± 0.03bc   | 0.31 ± 0.02c   | 0.65 ± 0.29b   | 0.56 ± 0.15bc  | 0.42 ± 0.03bc  | 0.36 ± 0.12bc  |
|           | Methyl palmitate                                                  | 42.44 | 1922 | 1926 | 1.62 ± 0.09b  | 1.85 ± 0.19ab   | 2.03 ± 0.2a    | 1.87 ± 0.13ab  | 1.71 ± 0.01b   | 1.64 ± 0.15b   | 1.86 ± 0.17ab  |
| Aldehydes | benzaldehyde                                                      | 6.19  | 959  | 962  | 2.05 ± 0.34b  | 4.29 ± 0.73a    | 5.54 ± 0.4a    | 5.06 ± 0.51a   | 5 ± 1.13a      | 4.82 ± 1.39a   | 4.71 ± 0.82a   |
|           | (E,E)-2,4-Heptadienal                                             | 7.41  | 1009 | 1012 | 4.06 ± 0.82b  | 5.44 ± 0.69a    | 4.93 ± 0.09ab  | 5.1 ± 0.29a    | 5.02 ± 0.14a   | 4.7 ± 0.32ab   | 5.35 ± 0.86a   |
|           | phenylacetaldehyde (PAG)                                          | 8.40  | 1039 | 1045 | 15.53 ± 1.11c | 32.87 ± 2.04ab  | 32.97 ± 3.52ab | 29 ± 0.32b     | 31.38 ± 4.54ab | 32.5 ± 1.43ab  | 35.51 ± 0.72a  |
|           | E-2-Octenal                                                       | 8.86  | 1055 | 1060 | 6.53 ± 0.5ab  | 6.54 ± 0.25ab   | 6.33 ± 0.34abc | 6.05 ± 0.5bc   | 6.87 ± 0.57a   | 5.8 ± 0.33c    | 6.37 ± 0.38abc |
|           | 2-2-[2S,5S)-5-Vinyltetrahydro-5-methylfuran-2-yl] propionaldehyde | 12.59 | 1146 | 1154 | 1.37 ± 0.23a  | 0.94 ± 0.12b    | 1 ± 0.2b       | 0.88 ± 0.15bc  | 0.77 ± 0.12bc  | 0.63 ± 0.06c   | 0.66 ± 0.13c   |
|           | trans-2-Nonenal                                                   | 13.10 | 1157 | 1162 | 2.2 ± 0.69    | 2.4 ± 0.53      | 2.49 ± 0.55    | 2.42 ± 0.54    | 2.54 ± 0.42    | 2.44 ± 0.43    | 2.4 ± 0.28     |
|           | decanal                                                           | 15.40 | 1204 | 1206 | 2.45 ± 0.39b  | 2.54 ± 0.18ab   | 2.65 ± 0.39ab  | 2.6 ± 0.25ab   | 2.98 ± 0.24a   | 2.53 ± 0.24ab  | 2.81 ± 0.22ab  |
|           | β-Cyclocitraldehyde                                               | 16.01 | 1214 | 1220 | 14.86 ± 2.02a | 10.13 ± 1.2bc   | 11.69 ± 0.91bc | 11.68 ± 0.41bc | 12.27 ± 1.7b   | 9.65 ± 1.17c   | 11.88 ± 1.33bc |
|           | cis-Citraldehyde                                                  | 17.07 | 1233 | 1240 | 15.08 ± 1.49a | 13.28 ± 1.56abc | 13.38 ± 1.59ab | 12.36 ± 0.13bc | 13 ± 0.33bc    | 11.51 ± 0.19bc | 11.41 ± 1.09c  |
|           | trans-2-Decenal                                                   | 18.56 | 1260 | 1263 | 2.17 ± 0.06a  | 1.74 ± 0.14b    | 2.22 ± 0.13Aa  | 1.6 ± 0.28b    | 1.87 ± 0.24ab  | 1.59 ± 0.07b   | 2.22 ± 0.46a   |
|           | α-Ethylidene-phenylacetaldehyde                                   | 18.79 | 1263 | 1279 | 3.43 ± 0.18c  | 3.34 ± 0.61c    | 3.75 ± 0.87bc  | 3.93 ± 0.57bc  | 4.39 ± 0.92abc | 4.81 ± 0.89ab  | 5.5 ± 0.9a     |
|           | citraldehyde                                                      | 18.84 | 1264 | 1276 | 4.67 ± 0.7c   | 7.57 ± 0.07b    | 8 ± 0.43ab     | 7.68 ± 0.62b   | 8.28 ± 0.63ab  | 7.58 ± 0.29b   | 8.79 ± 0.46a   |

|                     |                                                                    |       |      |      |             |             |             |              |              |             |             |
|---------------------|--------------------------------------------------------------------|-------|------|------|-------------|-------------|-------------|--------------|--------------|-------------|-------------|
|                     | 2-Undecenal                                                        | 24.01 | 1360 | 1367 | 3.19±0.7    | 3.02±0.29   | 3.43±0.55   | 2.94±0.21    | 3.25±0.21    | 2.95±0.07   | 3.75±0.82   |
|                     | coccaldehyde (CH20)3                                               | 29.77 | 1471 | 1786 | 0.76±0.03bc | 0.61±0.09c  | 0.79±0.13bc | 0.8±0.13bc   | 0.89±0.12b   | 0.89±0.03b  | 1.23±0.23a  |
| Ketones             | ketamine                                                           | 24.57 | 1371 | 1386 | 0.54±0.17b  | 1.09±0.13ab | 1.33±0.2a   | 1.54±0.37a   | 1.59±0.56a   | 1.63±0.24a  | 1.51±0.54a  |
|                     | α-Violanone                                                        | 26.66 | 1411 | 1426 | 1.46±0.07b  | 1.35±0.29b  | 1.52±0.21ab | 1.54±0.14ab  | 1.66±0.15ab  | 1.48±0.06b  | 1.91±0.47a  |
|                     | Geranylacetone                                                     | 28.01 | 1437 | 1453 | 2.44±0.34a  | 1.85±0.21bc | 2.05±0.26bc | 1.92±0.05bc  | 2.15±0.11ab  | 1.83±0.07bc | 1.78±0.11c  |
|                     | β-Violanone                                                        | 29.48 | 1465 | 1486 | 9.34±0.14b  | 8.96±1.26b  | 9.96±0.96b  | 10.42±0.65ab | 10.67±0.85ab | 10.24±0.4ab | 12.06±2.26a |
|                     | 4-[2,2,6-Trimethyl-7-oxabicyclo<br>[4.1.0]hept-1-yl]-3-buten-2-one | 29.64 | 1468 | 1473 | 3.28±0.18a  | 2.14±0.26c  | 2.35±0.36c  | 2.28±0.09c   | 2.45±0.31bc  | 2.14±0.16c  | 2.85±0.4ab  |
| Hydrocarbons        | limonene                                                           | 7.97  | 1026 | 1030 | 30.64±1.76  | 31.63±0.98  | 32.12±1.7   | 32.78±0.77   | 34.91±0.42   | 31.85±5.77  | 31.47±3.9   |
|                     | naphthalene                                                        | 14.20 | 1180 | 1182 | 6.79±0.19a  | 3.14±0.27e  | 3.55±0.34de | 3.81±0.43d   | 6.08±0.53b   | 4.09±0.11d  | 5.09±0.43c  |
|                     | dodecane                                                           | 15.14 | 1199 | 1200 | 1.09±0.08ab | 1.03±0.12ab | 1.11±0.12ab | 0.88±0.11b   | 1.07±0.17ab  | 1.29±0.22a  | 1.11±0.17ab |
|                     | (E)-4-Decen-6-yne                                                  | 19.53 | 1277 | 1244 | 0.71±0.06c  | 1.04±0.18b  | 1.07±0.08b  | 1.17±0.08ab  | 1.17±0.25ab  | 1.05±0.16b  | 1.45±0.24a  |
|                     | 1-Methylnaphthalene                                                | 20.10 | 1286 | 1307 | 4.51±0.34a  | 2.72±0.1c   | 3.34±0.51b  | 3.38±0.34b   | 4.57±0.39a   | 3.21±0.22bc | 3.68±0.08b  |
|                     | tridecane                                                          | 20.76 | 1299 | 1300 | 1.77±0.08   | 1.74±0.31   | 1.86±0.32   | 1.87±0.27    | 1.89±0.27    | 2±0.35      | 2.09±0.18   |
|                     | Picrasidine                                                        | 22.97 | 1341 | 1389 | 1.57±0.14a  | 0.98±0.09b  | 1.14±0.09b  | 1.08±0.22b   | 1.03±0.08b   | 0.99±0.15b  | 1.08±0.14b  |
|                     | n-tetradecane                                                      | 25.90 | 1396 | 1400 | 1.77±0.3a   | 1.06±0.11c  | 1.21±0.11bc | 1.2±0.1bc    | 1.61±0.09ab  | 1.31±0.02bc | 1.85±0.59a  |
|                     | Δ - juniperene                                                     | 31.52 | 1504 | 1524 | 3.17±0.14a  | 2.33±0.4b   | 2.38±0.14b  | 2.32±0.17b   | 2.22±0.15b   | 2.05±0.08b  | 2.25±0.21b  |
|                     | β - curcumene                                                      | 32.18 | 1518 | 1514 | 1.24±0.05   | 1.23±0.27   | 1.3±0.18    | 1.33±0.14    | 1.28±0.16    | 1.23±0.13   | 1.27±0.09   |
| Carboxylic<br>acids | trans-3-Hexenoic acid                                              | 7.23  | 1002 | 1021 | 4.18±0.04d  | 8.57±0.23a  | 8.33±0.98a  | 6.19±0.37bc  | 7.47±0.97ab  | 6.07±0.57c  | 6.86±1.2bc  |
|                     | heptanoic acid                                                     | 9.63  | 1075 | 1078 | 1.36±0.26   | 1.65±0.05   | 1.68±0.14   | 1.46±0.27    | 1.51±0.24    | 1.62±0.56   | 1.66±0.21   |
|                     | (2E)-3,7-Dimethyl-2,6-<br>octadienoic acid                         | 23.61 | 1353 | 1344 | 7.65±1.01b  | 16.08±3.72a | 16.33±2.36a | 15.98±2.34a  | 15.97±3.84a  | 15.55±3.43a | 15.93±3.14a |



|         |                                  |       |      |      |            |             |            |            |              |             |              |
|---------|----------------------------------|-------|------|------|------------|-------------|------------|------------|--------------|-------------|--------------|
|         | (Z)-7-Decen-5-oic acid           | 29.94 | 1473 | 1518 | 1.16±0.1c  | 1.3±0.29abc | 1.68±0.38a | 1.65±0.3ab | 1.48±0.18abc | 1.27±0.09bc | 1.41±0.05abc |
| Phenols | eugenol                          | 23.22 | 1345 | 1357 | 1.92±0.07  | 1.85±0.25   | 2.15±0.11  | 2.13±0.17  | 1.92±0.23    | 2.32±0.55   | 2.13±0.54    |
|         | 2,6-Di-tert-butyl-4-methylphenol | 30.82 | 1490 | 1513 | 0.48±0.04a | 0.24±0.04b  | 0.28±0.05b | 0.32±0.07b | 0.32±0.08b   | 0.32±0.04b  | 0.32±0.09b   |
|         | 2,4-Di-tert-butylphenol          | 31.10 | 1495 | 1519 | 4.91±0.06a | 3.02±0.11b  | 3.28±0.33b | 3.34±0.72b | 3.43±0.68b   | 3.47±0.63b  | 4.79±0.75a   |

**Note: Different letters indicate significant differences (p<0.05) . R. T. – Retention time; RI- Retention Index**

**Table S5. Relative content of main non-volatile components during different rolling times of black tea (mg/g).**

| Compound name              | Theoretical m/z | MS/MS fragments                   | Relative content (mg/g) |              |              |              |              |              |              |
|----------------------------|-----------------|-----------------------------------|-------------------------|--------------|--------------|--------------|--------------|--------------|--------------|
|                            |                 |                                   | RT0                     | RT20         | RT40         | RT60         | RT80         | RT100        | RT120        |
| Theobromine                | 181.0720        | 163,138,122,110,8<br>3,69,67,56   | 0.52±0.027ab            | 0.55±0.027a  | 0.54±0.008ab | 0.51±0.017b  | 0.55±0.02a   | 0.55±0.033a  | 0.56±0.035a  |
| Theophylline               | 181.0720        | 124,96,69                         | 0.99±0.076              | 1.02±0.014   | 1±0.046      | 0.97±0.032   | 1±0.013      | 0.99±0.079   | 0.94±0.077   |
| Caffeine                   | 195.0877        | 138,123,110,83,69,<br>56          | 30.43±0.545c            | 34.71±0.645b | 36.17±0.278a | 35.88±0.171a | 35.81±0.489a | 36.03±0.769a | 36.09±0.854a |
| Theaflavin                 | 565.1341        | 427277139.0000                    | 0.08±0.001f             | 0.14±0.004a  | 0.13±0.005b  | 0.12±0.003c  | 0.11±0.001cd | 0.11±0.004d  | 0.1±0.002e   |
| Theaflavin-3-gallate       | 717.1450        | 579379277139.000<br>0             | 0.07±0.002d             | 0.13±0.001ab | 0.13±0.0008a | 0.12±0.002ab | 0.12±0.001ab | 0.12±0.003b  | 0.12±0.003c  |
| Theaflavin-3'-gallate      | 717.1450        | 591579333277139.<br>0000          | 0.09±0.002c             | 0.14±0.005a  | 0.13±0.001b  | 0.13±0.006b  | 0.13±0.007ab | 0.12±0.007b  | 0.12±0.007b  |
| Theaflavins-3,3'-digallate | 869.1560        | 743699529333277<br>000.0000       | 0.2±0.008b              | 0.24±0.011a  | 0.24±0.006a  | 0.25±0.009a  | 0.24±0.005a  | 0.24±0.005a  | 0.24±0.007a  |
| Shikimic acid              | 175.0601        | 158,84,56                         | 10.9±0.638a             | 9.23±0.3b    | 9.28±0.49Bb  | 9.25±0.168Bb | 8.9±0.179b   | 8.94±0.126b  | 8.92±0.094b  |
| Tartaric acid              | 151.0147        | 119, 90, 75                       | 0.33±0.008a             | 0.25±0.01b   | 0.21±0.001Cc | 0.2±0.005Cd  | 0.18±0.006e  | 0.16±0.002f  | 0.16±0.004f  |
| α-Ketoglutaric acid        | 145.0426        | 129, 101, 87                      | 0.23±0.014b             | 0.25±0.011a  | 0.23±0.01b   | 0.24±0.008ab | 0.23±0.002b  | 0.24±0.005b  | 0.24±0.005ab |
| Succinic acid              | 101.0180        | 85, 57                            | 0.04±0.002              | 0.04±0.001   | 0.04±0       | 0.04±0       | 0.04±0       | 0.04±0       | 0.04±0       |
| Gallic acid                | 171.0288        | 153,135,127,125,1<br>09,107,81,53 | 0.13±0.009e             | 0.17±0.006a  | 0.16±0.009ab | 0.15±0.004bc | 0.15±0.003c  | 0.14±0.005d  | 0.14±0.002d  |
| Chlorogenic acid           | 355.1042        | 163,145,135,117,8<br>9            | 0.02±0a                 | 0.01±0b      | 0.01±0c      | 0±0d         | 0.01±0c      | 0±0e         | 0±0f         |

|                                   |          |                                       |              |              |              |              |             |               |               |
|-----------------------------------|----------|---------------------------------------|--------------|--------------|--------------|--------------|-------------|---------------|---------------|
| Salicylic acid                    | 139.0390 | 121,93,65                             | 0.46±0.008a  | 0.1±0.007b   | 0.08±0.005c  | 0.06±0.003d  | 0.05±0.001e | 0.04±0.002f   | 0.04±0.002f   |
| Pyruvic acid                      |          |                                       | 0.02±0.001ab | 0.02±0.001a  | 0.02±0.001a  | 0.02±0ab     | 0.02±0ab    | 0.02±0.001b   | 0.02±0ab      |
| Vitexin                           | 433.1129 | 415,397,367,313,283                   | 0.04±0.002a  | 0.03±0.001b  | 0.03±0.001b  | 0.03±0.001b  | 0.03±0b     | 0.03±0b       | 0.03±0b       |
| Myricetin                         | 319.0448 | 273,245,217,165,153,137,111,69        | 0.17±0.009a  | 0.07±0.003b  | 0.06±0.003c  | 0.05±0.001d  | 0.04±0.002d | 0.03±0.001e   | 0.03±0.001e   |
| Quercetin                         | 449.1078 | 303,129,85,71,57                      | 0.16±0.007b  | 0.18±0.007a  | 0.17±0.007a  | 0.17±0.003a  | 0.16±0.006b | 0.15±0b       | 0.15±0.004b   |
| Kaempferol                        | 287.0550 | 153,69                                | 0.29±0.023c  | 0.33±0.021ab | 0.34±0.019a  | 0.3±0.013bc  | 0.34±0.018a | 0.32±0.005abc | 0.32±0.013abc |
| Myricetin 3-O-galactoside         | 465.1028 | 303                                   | 0.36±0.021a  | 0.14±0.009b  | 0.13±0.007c  | 0.09±0.005d  | 0.08±0.005d | 0.07±0.003e   | 0.07±0.003e   |
| Glucosyl-vitexin                  | 611.1607 | 449,329,287,85                        | 0.03±0.002bc | 0.04±0.001a  | 0.03±0e      | 0.04±0.001a  | 0.03±0.001b | 0.03±0cd      | 0.03±0.001de  |
| Quercetin-7-O-β-D-glucopyranoside | 465.1028 | 303                                   | 0.08±0.007   | 0.08±0.005   | 0.08±0.001   | 0.08±0.001   | 0.08±0.003  | 0.08±0.001    | 0.08±0.001    |
| Quercetin-3-o-rutinoside          | 611.1607 | 449,329,287,85                        | 0.29±0.017a  | 0.22±0.008b  | 0.23±0.013b  | 0.2±0.006c   | 0.2±0.006c  | 0.18±0.01c    | 0.19±0.006c   |
| vitexin-2"-o-rhamnoside           | 579.1708 | 415,397,367,313,283,85                | 0.05±0.002c  | 0.06±0.002b  | 0.04±0.002c  | 0.06±0.001b  | 0.06±0.001b | 0.06±0.002a   | 0.07±0.002a   |
| Quercitrin                        | 449.1078 | 303,129,85,71,57                      | 0.22±0.006d  | 0.23±0.008d  | 0.25±0.007bc | 0.26±0.009bc | 0.28±0.004a | 0.26±0.012ab  | 0.25±0.015c   |
| Kaempferitrin                     | 579.1708 | 433,287,85                            | 0.06±0.001a  | 0.05±0.001c  | 0.04±0.001d  | 0.05±0c      | 0.05±0.001c | 0.05±0.002b   | 0.05±0.002b   |
| Quercetin-7- O-α-L-rhamnoside     | 449.1078 | 303,229,85                            | 0.08±0.007   | 0.08±0.005   | 0.08±0.001   | 0.08±0.001   | 0.08±0.003  | 0.08±0.001    | 0.08±0.001    |
| Dihydrokaempferol 7-O-rhamnoside  | 435.1286 | 400,332,290,272,244,195,129,107,85,57 | 0.03±0.001a  | 0.03±0.001b  | 0.03±0.001b  | 0.02±0.001b  | 0.03±0.001b | 0.03±0.001b   | 0.03±0.001b   |
| Quercetin-3-galactoside           | 463.0866 | 319, 317, 301                         | 0.05±0.002c  | 0.06±0.002ab | 0.06±0.002b  | 0.06±0.001a  | 0.05±0.001c | 0.05±0c       | 0.05±0.002c   |

|                              |          |                                            |               |                |                |                 |                |                |                |
|------------------------------|----------|--------------------------------------------|---------------|----------------|----------------|-----------------|----------------|----------------|----------------|
| Isovitexin 2''-O-arabinoside | 565.1552 | 435,369,314,115,73                         | 0.25 ± 0.017d | 0.24 ± 0.009d  | 0.26 ± 0.008cd | 0.26 ± 0.013Bcd | 0.28 ± 0.007ab | 0.29 ± 0.012a  | 0.27 ± 0.01bc  |
| Benzyl β-glucosidea          | 293.0996 | 265,234,205,184,169,143,129,117            | 0.1 ± 0.002a  | 0.1 ± 0.007a   | 0.1 ± 0.001a   | 0.09 ± 0.005b   | 0.09 ± 0.004b  | 0.08 ± 0.002b  | 0.08 ± 0.003b  |
| 2-Phenylethyl glucosidea     | 307.1152 | 292,266,232,215,201,185,165,144,126,102,85 | 1.63 ± 0.048a | 0.14 ± 0.012b  | 0.1 ± 0.006c   | 0.1 ± 0.005c    | 0.07 ± 0.007d  | 0.05 ± 0.005d  | 0.05 ± 0.004d  |
| (Z)-3-hexenyl glucosidea     | 285.1309 | 268,235,211,179,153,129,105,92             | 0.02 ± 0a     | 0.02 ± 0b      | 0.01 ± 0c      | 0.01 ± 0d       | 0.01 ± 0e      | 0.01 ± 0e      | 0.01 ± 0e      |
| Geranyl glucosidea           | 339.1778 | 301,262,236,203,179,164,117                | 0.04 ± 0a     | 0.03 ± 0b      | 0.02 ± 0c      | 0.02 ± 0c       | 0.02 ± 0c      | 0.02 ± 0d      | 0.02 ± 0cd     |
| 2-Phenylethyl primeveroside  | 439.1575 | 401,307,275,218,170,133                    | 0.09 ± 0.009a | 0.03 ± 0.001c  | 0.03 ± 0.001bc | 0.03 ± 0.001bc  | 0.03 ± 0bc     | 0.03 ± 0.001b  | 0.03 ± 0.001bc |
| (Z)-3-hexenyl primeveroside  | 417.1731 | 417,375,336,317,301,285,242,217,195        | 0.04 ± 0.002  | nd             | nd             | nd              | nd             | nd             | nd             |
| Geranyl primeverosidea       | 471.2201 | 335,275,245,203,169,123                    | 0.19 ± 0.012a | 0.01 ± 0b      | 0.003 ± 0b     | nd              | nd             | nd             | nd             |
| L-Aspartic acid              | 134.0448 | 88,74,61                                   | 0.09 ± 0.007b | 0.09 ± 0.003ab | 0.09 ± 0.004ab | 0.1 ± 0.004a    | 0.09 ± 0.004ab | 0.09 ± 0.004ab | 0.09 ± 0.004ab |
| L-Asparagine                 | 133.0608 | 87,74,70,60                                | 0.07 ± 0.004a | 0.06 ± 0.001b  | 0.06 ± 0.001b  | 0.06 ± 0.001b   | 0.06 ± 0b      | 0.06 ± 0.001b  | 0.06 ± 0b      |
| L-Glutamic acid              | 148.0604 | 130,102,84,56                              | 0.11 ± 0.009  | 0.11 ± 0.002   | 0.11 ± 0.006   | 0.11 ± 0.005    | 0.11 ± 0.004   | 0.11 ± 0.005   | 0.11 ± 0.005   |
| L-Glutamine                  | 147.0764 | 130,84,56                                  | 0.1 ± 0.006a  | 0.08 ± 0.005c  | 0.09 ± 0.003bc | 0.09 ± 0.003bc  | 0.09 ± 0.005b  | 0.09 ± 0.002b  | 0.09 ± 0.004b  |

|                                  |          |                                  |                |                |                |                    |                |                |               |
|----------------------------------|----------|----------------------------------|----------------|----------------|----------------|--------------------|----------------|----------------|---------------|
| L-Lysine                         | 147.1128 | 102,84,56                        | 0.05 ± 0a      | 0.04 ± 0.002ab | 0.04 ± 0.002b  | 0.04 ± 0.002bc     | 0.04 ± 0.002c  | 0.04 ± 0.002c  | 0.04 ± 0.002c |
| L-Threonine                      | 120.0655 | 94,74,56                         | 1.34 ± 0.085a  | 1.07 ± 0.064b  | 1.01 ± 0.053bc | 1.02 ± 0.028bc     | 0.96 ± 0.016c  | 0.98 ± 0.027c  | 0.96 ± 0.038c |
| L-Hisidine                       | 156.0768 | 110,93,83,56                     | 0.04 ± 0a      | 0.03 ± 0.001b  | 0.03 ± 0c      | 0.02 ± 0.001d      | 0.02 ± 0e      | 0.02 ± 0f      | 0.02 ± 0f     |
| L-Proline                        | 116.0706 | 70                               | 0.46 ± 0.029a  | 0.42 ± 0.014b  | 0.42 ± 0.012b  | 0.43 ± 0.015b      | 0.42 ± 0.011b  | 0.43 ± 0.014b  | 0.43 ± 0.01b  |
| L-Valine                         | 118.0863 | 72,55                            | 0.68 ± 0.046   | 0.67 ± 0.018   | 0.67 ± 0.024   | 0.67 ± 0.011       | 0.66 ± 0.011   | 0.66 ± 0.005   | 0.65 ± 0.006  |
| L-Theanine                       | 175.1077 | 158,129,84,56                    | 10.47 ± 1.068  | 10.05 ± 1.681  | 10.06 ± 1.551  | 10.06 ± 1.634      | 9.84 ± 1.841   | 9.82 ± 1.784   | 9.66 ± 1.493  |
| L-Tyrosine                       | 182.0812 | 136,123,119,95,91,<br>27         | 0.59 ± 0.037a  | 0.54 ± 0.008b  | 0.54 ± 0.015bc | 0.53 ±<br>0.014bcd | 0.52 ± 0.01bcd | 0.51 ± 0.016cd | 0.5 ± 0.012d  |
| L-Leucine                        | 132.1019 | 86,69,55                         | 5.78 ± 0.108a  | 5.39 ± 0.198b  | 5.18 ± 0.145cd | 5.24 ± 0.076bc     | 5.1 ± 0.04cd   | 5.09 ± 0.117cd | 5 ± 0.116d    |
| L-Phenylalanine                  | 166.0863 | 120,103,77,51                    | 0.17 ± 0.027e  | 0.36 ± 0.027d  | 0.43 ± 0.046c  | 0.48 ± 0.038b      | 0.5 ± 0.026ab  | 0.53 ± 0.046ab | 0.54 ± 0.032a |
| L-Tryptophan                     | 205.0972 | 188,170,146,118                  | 1.33 ± 0.022a  | 1.17 ± 0.038b  | 1.14 ± 0.041bc | 1.13 ± 0.066bc     | 1.07 ± 0.06cd  | 1.07 ± 0.053cd | 1.03 ± 0.044d |
| L-Methionine                     | 150.0583 | 56, 61, 74, 87, 104,<br>115, 133 | 0.02 ± 0.001cd | 0.02 ± 0a      | 0.02 ± 0b      | 0.02 ± 0c          | 0.02 ± 0d      | 0.01 ± 0e      | 0.01 ± 0f     |
| γ-aminobutyric acid              | 104.0707 | 83, 75, 71                       | 0.03 ± 0.001   | 0.03 ± 0.001   | 0.03 ± 0       | 0.03 ± 0           | 0.03 ± 0       | 0.03 ± 0.001   | 0.03 ± 0      |
| Epigallocatechin<br>gallate/EGCG | 459.0922 | 289,205,181,153,1<br>39,123,65   | 2.17 ± 0.071a  | 0.45 ± 0.019b  | 0.39 ± 0.029c  | 0.3 ± 0.013d       | 0.24 ± 0.023e  | 0.18 ± 0.013f  | 0.18 ± 0.014f |
| Gallocatechin gallate/GCG        | 459.0922 | 289,205,181,153,1<br>39,123,65   | 3.2 ± 0.056a   | 0.73 ± 0.04b   | 0.61 ± 0.029c  | 0.48 ± 0.018d      | 0.38 ± 0.031e  | 0.29 ± 0.024f  | 0.29 ± 0.024f |
| Epicatechin gallate/ECG          | 443.0973 | 291,273,207,153,1<br>39,77       | 2.43 ± 0.091a  | 1.24 ± 0.036b  | 1.06 ± 0.063c  | 0.8 ± 0.032d       | 0.67 ± 0.053e  | 0.49 ± 0.028f  | 0.49 ± 0.028f |
| Epicatechin /EC                  | 291.0863 | 207,139,123,95,55                | 0.93 ± 0.034a  | 0.25 ± 0.003b  | 0.18 ± 0.001c  | 0.12 ± 0.005d      | 0.1 ± 0.01d    | 0.07 ± 0.001e  | 0.07 ± 0.001e |
| Epigallocatechin/EGC             | 307.0812 | 223,195,163,139,9<br>5           | 4.22 ± 0.086a  | 0.36 ± 0.017b  | 0.28 ± 0.012c  | 0.21 ± 0.009d      | 0.16 ± 0.008de | 0.12 ± 0.008e  | 0.12 ± 0.006e |

|                  |          |                    |             |             |             |             |              |              |             |
|------------------|----------|--------------------|-------------|-------------|-------------|-------------|--------------|--------------|-------------|
| gallocatechin/GC | 307.0812 | 223,195,163,139,95 | 0.17±0.011a | 0.12±0.006c | 0.13±0.004b | 0.14±0.009b | 0.13±0.007b  | 0.13±0.005bc | 0.14±0.007b |
| (+)-Catechin/C   | 291.0863 | 207,139,123,95,55  | 1.43±0.089a | 0.36±0.016b | 0.26±0.009c | 0.17±0.003d | 0.15±0.006de | 0.1±0.006e   | 0.1±0.006e  |

---

**Note: Different letters indicate significant differences (p<0.05). nd= not detected**
